# Supplementary material for: Utility of Select Gene Mutation Detection in Tumors by the Idylla Rapid Multiplex PCR Platform in Comparison to Next-Generation Sequencing
Source: MDPI journal article supplement (doi:10.3390/genes13050799), 2022-04-29
Supplement: s1 [file s1]

## **Supplemental Tables**

### **Utility of select gene mutation detection in tumors by the Idylla rapid multiplex PCR platform in comparison to next-generation sequencing**

Dingani Nkosi<sup>1</sup>, Vektra L. Casler<sup>1</sup>, Chauncey R. Syposs<sup>1</sup> and Zoltán N. Oltvai<sup>1</sup>

<sup>1</sup> Department of Pathology and Laboratory Medicine, University of Rochester School of Medicine & Dentistry, Rochester, NY 14642, USA

## Supplementary Table S1A-B: Gene list for the NGS based assays

### Supplemental Table S1A: Oncomine Focus Assay (OFA) hotspot gene list

The Oncomine Focus Assay (OFA) (Thermo Fisher) enables the detection of variants listed in the table of genes, including single nucleotide variants (SNVs) and insertion/deletions (Indels). The limit of detection for SNVs and indels is precise and reproducible at 5% allele frequency with 500X coverage. The limit of detection of indels is less than 25bp. Genes are only interrogated in hotspot regions and are not sequenced in their entirety. Mutations outside the 989 hotspot variants will not be covered by this assay. Variants of uncertain origin (germline versus somatic origin) cannot be determined unequivocally based on sequencing tumor samples alone. The data obtained are analyzed with the Ion Reporter™ software for variant classification and the Torrent Suite Analysis plugin for the coverage analysis. The mutation nomenclature is based on the recommendation from the Catalogue of Somatic Mutations in Cancer (COSMIC, <http://cancer.sanger.ac.uk/cosmic>).

| Gene   | Accession #    | Exon(s)             |
|--------|----------------|---------------------|
| AKT1   | NM_001014431.1 | 3                   |
| BRAF   | NM_004333.4    | 11,15               |
| DDR2   | NM_006182.2    | 5                   |
| ERBB3  | NM_001982.3    | 2,3,6,8,9           |
| FGFR2  | NM_000141.4    | 7-9,12,14           |
| GNAQ   | NM_002072.4    | 4,5                 |
| IDH2   | NM_002168.2    | 4                   |
| JAK3   | NM_000215.3    | 11,12,15            |
| MAP2K1 | NM_002755.3    | 2,3,6               |
| MTOR   | NM_004958.3    | 30,39,40,43,47,53   |
| PIK3CA | NM_006218.3    | 2,5,6,8,10,14,19,21 |
| ROS1   | NM_002944.2    | 36,38               |
| AR     | NM_000044.3    | 6,8                 |
| CTNNB1 | NM_001904.3    | 3                   |
| ERBB2  | NM_004448.3    | 8,17-22             |
| ESR1   | NM_001122740.1 | 9                   |
| GNA11  | NM_002067.4    | 4,5                 |
| IDH1   | NM_005896.2    | 4                   |
| JAK2   | NM_004972.3    | 14                  |
| KRAS   | NM_033360.3    | 2-4                 |
| MET    | NM_001127500.2 | 14,16,19            |
| PDGFRA | NM_006206.5    | 12,14,18            |
| RET    | NM_020975.4    | 10,11,13,15,16      |
| ALK    | NM_004304.4    | 21-25               |
| CDK4   | NM_000075.3    | 2                   |
| EGFR   | NM_005228.4    | 3,7,12,15,18-21     |
| ERBB4  | NM_005235      | 18                  |

|        |                |              |
|--------|----------------|--------------|
| FGFR3  | NM_000142.4    | 7,9,14,16    |
| HRAS   | NM_001130442.1 | 2,3          |
| JAK1   | NM_002227.2    | 14-16        |
| KIT    | NM_000222.2    | 8,9,11,13,17 |
| MAP2K2 | NM_030662.3    | 2            |
| NRAS   | NM_002524.4    | 2-4          |
| RAF1   | NM_002880.3    | 7,12         |
| SMO    | NM_005631.4    | 4,6,8,9      |

#### Supplemental Table S1B: TruSeq myeloid panel gene list

The presence or absence of mutations are determined by next generation sequencing (NGS) analysis using the Illumina Truseq Myeloid Panel. This analysis applies only to single base-pair and small insertion/deletion alterations up to 25 base-pairs in the coding regions and adjacent intron/exon boundaries, although it can detect *FLT3* ITDs that are greater than 25-base-pairs. False negative results are also possible due to mutant cell populations below the analytical sensitivity of the method, which is approximately 5% of cells for most mutations, 10% of cells for the common *ASXL1* mutation c.1934dupG and 2% of cells for several hotspot positions including *IDH1* R132, *IDH2* R140 and R172, *JAK2* V617 and exon 12, *MYD88* L265, *NOTCH1* c.7541\_7542del, *BRAF* V600E, *KIT* D816, *NRAS* G12, G13 and Q61.

| Gene   | Accession #    | Exon(s)         |
|--------|----------------|-----------------|
| ASXL1  | NM_015338.5    | 12              |
| CBL    | NM_005188.3    | 8, 9            |
| ETV6   | NM_001987.4    | all             |
| FLT3   | NM_004119.2    | 14, 15, 20      |
| IDH1   | NM_005896.2    | 4               |
| KIT    | NM_000222.2    | 2, 8-11, 13, 17 |
| MYD88  | NM_002468.4    | 3-5             |
| NRAS   | NM_002524.4    | 2, 3            |
| RUNX1  | NM_001754.4    | all             |
| SRSF2  | NM_001195427.1 | 1               |
| TP53   | NM_000546.5    | 2-11            |
| ZRSR2  | NM_005089.3    | all             |
| BCOR   | NM_001123385.1 | all             |
| CSF3R  | NM_156039.3    | 14-17           |
| EZH2   | NM_004456.4    | all             |
| GATA1  | NM_002049.3    | 2               |
| IDH2   | NM_002168.2    | 4               |
| KRAS   | NM_033360.2    | 2, 3            |
| NOTCH1 | NM_017617.3    | 26-28, 34       |

|        |                |        |
|--------|----------------|--------|
| PHF6   | NM_032458.2    | all    |
| SETBP1 | NM_015559.2    | 4      |
| STAG2  | NM_001042749.1 | all    |
| U2AF1  | NM_001025203.1 | 2, 6   |
| BRAF   | NM_004333.4    | 15     |
| DNMT3a | NM_022552.4    | all    |
| FBXW7  | NM_033632.3    | 9-11   |
| GATA2  | NM_032638.4    | 2-6    |
| JAK2   | NM_004972.3    | 12, 14 |
| MPL    | NM_005373.2    | 10     |
| NPM1   | NM_002520.6    | 12     |
| PTPN11 | NM_002834.3    | 3, 13  |
| SF3B1  | NM_012433.2    | 13-16  |
| TET2   | NM_001127208.2 | 3-11   |
| WT1    | NM_024426.4    | 7, 9   |

## Supplementary Table S2A-D: Mutations detected by Idylla cartridges

### Supplemental Table S2A: BRAF cartridge detectable mutations

The Idylla BRAF mutation assay uses an integrated, real-time PCR-based system for qualitative detection of *BRAF* V600 wild type, and V600E, V600E2, V600D, V600K, V600R and V600M mutations.

| Protein Change | Nucleotide Change     |
|----------------|-----------------------|
| BRAF V600E     | (c.1799T>A)           |
| BRAF V600E2    | (c.1799_1800delinsAA) |
| BRAF V600D     | (c.1799_1800delinsAT) |
| BRAF V600D     | (c.1799_1800delinsAC) |
| BRAF V600K     | (c.1798_1799delinsAA) |
| BRAF V600R     | (c.1798_1799delinsAG) |
| BRAF V600M     | (c.1798G>A)           |
| BRAF Wild Type | (c.1799T)             |

### Supplemental Table S2B: EGFR cartridge detectable mutations

The Idylla EGFR mutation assay uses an integrated, real-time PCR-based system for qualitative detection of 52 mutations in exon 18, 19, 20, and 21 of *EGFR*.

| GENE        | EXON | MUTATION    | PROTEIN CHANGE           | NUCLEOTIDE CHANGE    |
|-------------|------|-------------|--------------------------|----------------------|
| <i>EGFR</i> | 18   | G719A       | p.Gly719Ala              | c.2156G>C            |
| <i>EGFR</i> | 18   | G719C       | p.Gly719Cys              | c.2155G>T            |
| <i>EGFR</i> | 18   | G719C       | p.Gly719Cys              | c.2154_2155delinsTT  |
| <i>EGFR</i> | 18   | G719S       | p.Gly719Ser              | c.2155G>A            |
| <i>EGFR</i> | 19   | Deletion 9  | p.Leu747_Ala750delinsPro | c.2238_2248delinsGC  |
| <i>EGFR</i> | 19   | Deletion 9  | p.Leu747_Ala750delinsPro | c.2239_2248delinsC   |
| <i>EGFR</i> | 19   | Deletion 9  | p.Leu747_Ala750delinsSer | c.2240_2248del       |
| <i>EGFR</i> | 19   | Deletion 9  | p.Leu747_Glu749del       | c.2239_2247del       |
| <i>EGFR</i> | 19   | Deletion 12 | p.Leu747_Thr751delinsPro | c.2239_2251delinsC   |
| <i>EGFR</i> | 19   | Deletion 12 | p.Leu747_Thr751delinsSer | c.2240_2251del       |
| <i>EGFR</i> | 19   | Deletion 15 | p.Glu746_Ala750del       | c.2235_2249del       |
| <i>EGFR</i> | 19   | Deletion 15 | p.Glu746_Ala750del       | c.2236_2250del       |
| <i>EGFR</i> | 19   | Deletion 15 | p.Leu747_Thr751del       | c.2239_2253del       |
| <i>EGFR</i> | 19   | Deletion 15 | p.Leu747_Thr751del       | c.2240_2254del       |
| <i>EGFR</i> | 19   | Deletion 15 | p.Leu747_Thr751del       | c.2238_2252del       |
| <i>EGFR</i> | 19   | Deletion 15 | p.Glu746_Thr751delinsAla | c.2237_2251del       |
| <i>EGFR</i> | 19   | Deletion 15 | p.Glu746_Thr751delinsIle | c.2235_2252delinsAAT |

|      |    |             |                             |                              |
|------|----|-------------|-----------------------------|------------------------------|
| EGFR | 19 | Deletion 15 | p.Glu746_Thr751delinsVal    | c.2237_2252delinsT           |
| EGFR | 19 | Deletion 15 | p.Lys745_Ala750delinsThr    | c.2234_2248del               |
| EGFR | 19 | Deletion 15 | p.Glu746_Thr751delinsLeu    | c.2236_2253delinsCTA         |
| EGFR | 19 | Deletion 15 | p.Glu746_Thr751delinsVal    | c.2237_2253delinsTA          |
| EGFR | 19 | Deletion 15 | p.Glu746_Thr751delinsAla    | c.2235_2251delinsAG          |
| EGFR | 19 | Deletion 15 | p.Glu746_Thr751delinsGln    | c.2236_2253delinsCAA         |
| EGFR | 19 | Deletion 15 | p.Ile744_Ala750delinsValLys | c.2230_2249delinsGTCAA       |
| EGFR | 19 | Deletion 18 | p.Leu747_Pro753delinsSer    | c.2240_2257del               |
| EGFR | 19 | Deletion 18 | p.Glu746_Ser752delinsVal    | c.2237_2255delinsT           |
| EGFR | 19 | Deletion 18 | p.Leu747_Ser752del          | c.2239_2256del               |
| EGFR | 19 | Deletion 18 | p.Glu746_Thr751del          | c.2236_2253del               |
| EGFR | 19 | Deletion 18 | p.Leu747_Pro753delinsGln    | c.2239_2258delinsCA          |
| EGFR | 19 | Deletion 18 | p.Glu746_Ser752delinsAla    | c.2237_2254del               |
| EGFR | 19 | Deletion 18 | p.Glu746_Ser752delinsAsp    | c.2238_2255del               |
| EGFR | 19 | Deletion 18 | p.Glu746_Pro753delinsValSer | c.2237_2257delinsTCT         |
| EGFR | 19 | Deletion 18 | p.Glu746_Ser752delinsIle    | c.2236_2255delinsAT          |
| EGFR | 19 | Deletion 18 | p.Glu746_Ser752delinsIle    | c.2236_2256delinsATC         |
| EGFR | 19 | Deletion 18 | p.Glu746_Ser752delinsVal    | c.2237_2256delinsTT          |
| EGFR | 19 | Deletion 18 | p.Glu746_Ser752delinsVal    | c.2237_2256delinsTC          |
| EGFR | 19 | Deletion 18 | p.Glu746_Ser752delinsVal    | c.2235_2255delinsGGT         |
| EGFR | 19 | Deletion 21 | p.Leu747_Pro753del          | c.2238_2258del               |
| EGFR | 19 | Deletion 21 | p.Glu746_Ser752del          | c.2236_2256del               |
| EGFR | 19 | Deletion 24 | p.Ser752_Ile759del          | c.2253_2276del               |
| EGFR | 20 | T790M       | p.Thr790Met                 | c.2369C>T                    |
| EGFR | 20 | S768I       | p.Ser768Ile                 | c.2303G>T                    |
| EGFR | 20 | InsG        | p.Asp770_Asn771insGly       | c.2310_2311insGGT            |
| EGFR | 20 | InsASV(9)   | p.Val769_Asp770insAlaSerVal | c.2307_2308insGCCAGCGTG      |
| EGFR | 20 | InsASV(11)  | p.Val769_Asp770insAlaSerVal | c.2309_2310delinsCCAGCGTGGAT |
| EGFR | 20 | InsSVD      | p.Asp770_Asn771insSerValAsp | c.2311_2312insGCGTGGACA      |
| EGFR | 20 | InsH        | p.His773_Val774insHis       | c.2319_2320insCAC            |
| EGFR | 21 | L858R       | p.Leu858Arg                 | c.2573T>G                    |
| EGFR | 21 | L858R       | p.Leu858Arg                 | c.2573_2574delinsGT          |
| EGFR | 21 | L858R       | p.Leu858Arg                 | c.2573_2574delinsGA          |
| EGFR | 21 | L861Q       | p.Leu861Gln                 | c.2582T>A                    |

### Supplemental Table S2C: KRAS cartridge detectable mutations

The Idylla KRAS mutation assay uses an integrated, real-time PCR-based system for qualitative detection of 21 mutations in exon 2, 3, and 4 of *KRAS*.

| Gene | Protein Change | Nucleotide Change           |
|------|----------------|-----------------------------|
| KRAS | G12C           | c.34G>T                     |
| KRAS | G12R           | c.34G>C                     |
| KRAS | G12S           | c.34G>A                     |
| KRAS | G12A           | c.35G>C                     |
| KRAS | G12D           | c.35G>A                     |
| KRAS | G12V           | c.35G>T                     |
| KRAS | G13D           | c.38G>A                     |
| KRAS | A59E           | c.176C>A                    |
| KRAS | A59G           | c.176C>G                    |
| KRAS | A59T           | c.175G>A                    |
| KRAS | Q61K           | c.181C>A; c.180_181delinsAA |
| KRAS | Q61L           | c.182A>T                    |
| KRAS | Q61R           | c.182A>G                    |
| KRAS | Q61H           | c.183A>C; c.183A>T          |
| KRAS | K117N          | c.351A>C; c.351A>T          |
| KRAS | A146P          | c.436G>C                    |
| KRAS | A146T          | c.436G>A                    |
| KRAS | A146V          | c.437C>T                    |

### Supplemental Table S2D: NRAS-BRAF cartridge detectable mutations

The Idylla NRAS-BRAF-EGFRS492R mutation assay uses an integrated, real-time PCR-based system for qualitative detection of mutations in codons 12, 13, 59, 61, 117, 146 of the *NRAS* gene, in codon 600 of the *BRAF* gene and in codon 492 of the *EGFR* gene (see Table 1: List of detectable variants).

| Gene | Protein Change | Variants            | Exon    |
|------|----------------|---------------------|---------|
| NRAS | G12C           | c.34G>T             | exon 2  |
| NRAS | G12S*          | c.34G>A*            | exon 2  |
| NRAS | G12D           | c.35G>A             | exon 2  |
| NRAS | G12A           | c.35G>C             | exon 2  |
| NRAS | G12V           | c.35G>T             | exon 2  |
| NRAS | G13D           | c.38G>A             | exon 2  |
| NRAS | G13V           | c.38G>T             | exon 2  |
| NRAS | G13R           | c.37G>C             | exon 2  |
| NRAS | A59T           | c.175G>A            | exon 3  |
| NRAS | Q61K           | c.181C>A            | exon 3  |
| NRAS | Q61L           | c.182A>T            | exon 3  |
| NRAS | Q61R           | c.182A>G            | exon 3  |
| NRAS | Q61H           | c.183A>C; c.183A>T  | exon 3  |
| NRAS | K117N          | c.351G>C; c.351G>T  | exon 4  |
| NRAS | A146T          | c.436G>A            | exon 4  |
| NRAS | A146V          | c.437C>T            | exon 4  |
| BRAF | V600E          | c.1799T>A           | exon 15 |
| BRAF | V600E          | c.1799_1800delinsAA | exon 15 |
| BRAF | V600D          | c.1799_1800delinsAC | exon 15 |
| BRAF | V600K          | c.1798_1799delinsAA | exon 15 |
| BRAF | V600R          | c.1798_1799delinsAG | exon 15 |
| EGFR | S492R          | c.1476C>A           | exon 12 |
| EGFR | S492R2         | c.1474A>C           | exon 12 |

\* Due to lower sensitivity, the *NRAS* G12S variant will not be reported.



### Supplementary Tables S3-10: Additional mutations in Idylla positive cases

Supplemental Table S3: Cutaneous melanoma specimens with Idylla-identifiable *BRAF* mutations and/or with additional genetic alterations

| GENE                                                  | Frequency | Idylla positive | Idylla Negative | Cases with extra mutations |
|-------------------------------------------------------|-----------|-----------------|-----------------|----------------------------|
| BRAF (melanoma)                                       | 27        | 21 (78%)        | 6 (17%)         | 8 (30%)                    |
| KIT, c.1594G>A, p.Val532Ile, Tier III                 |           |                 |                 |                            |
| MAP2K1, c.370_371delCCinsTT, p.Pro124Leu, Tier I      |           |                 |                 |                            |
| ALK, c.4403G>A, p.Gly1468Glu, Tier III                |           |                 |                 |                            |
| PDGFRA, c.2485G>A, p.Gly829Arg, Tier III              |           |                 |                 |                            |
| MAP2K1, c.149_151dupTTG, p.Leu50_Glu51insVal, Tier II |           |                 |                 |                            |
| JAK3, c.1933C>T, p.H645Y, Tier III                    |           |                 |                 |                            |
| *BRAF, c.1796_1797insTAC, p.Thr599dup, Tier I         |           |                 |                 |                            |
| NRAS, c.35G>A, p.Gly12Asp, Tier I                     |           |                 |                 |                            |
| *BRAF, c.1747T>C, p.Phe583Leu, Tier III I             |           |                 |                 |                            |
| FGFR2 c.941C>T p.Ala314Val Tier III                   |           |                 |                 |                            |
| *BRAF c.1406G>A p.Gly469Glu Tier I                    |           |                 |                 |                            |
| ROS1 c.5827G>A p.Glu1943Lys Tier II                   |           |                 |                 |                            |
| *BRAF c.875C>T p.Ser292Phe Tier III                   |           |                 |                 |                            |

**\*Idylla negative cases**

Supplemental Table S4: Cutaneous melanoma specimens with Idylla-identifiable *NRAS* mutations and/or with additional genetic alterations

| GENE                                           | Frequency | Idylla positive | Idylla Negative | Cases with extra mutations |
|------------------------------------------------|-----------|-----------------|-----------------|----------------------------|
| NRAS (melanoma)                                | 28        | 26 (93%)        | 2 (7%)          | 12 (43%)                   |
| IDH1, c.394C>T, p.Arg132Cys, Tier I (x3)       |           |                 |                 |                            |
| CTNNB1, c.101G>A, p.Gly34Glu, Tier I           |           |                 |                 |                            |
| HRAS, c.38G>A, p.Gly13Asp, Tier I              |           |                 |                 |                            |
| MET, c.1076G>A, p.Arg359Gln, Tier III          |           |                 |                 |                            |
| FGFR3, c.748C>T, p.Pro250Ser Tier III          |           |                 |                 |                            |
| MAP2K2, c.185C>G, p.Ala62Gly, Tier III         |           |                 |                 |                            |
| ROS1, c.5917G>A, p.Gly1973Arg, Tier III        |           |                 |                 |                            |
| BRAF c.1747T>C p.Phe583Leu Tier III            |           |                 |                 |                            |
| *NRAS, c.181_182delCAinsAG, p.Gln61Arg, Tier I |           |                 |                 |                            |
| *NRAS, c.180_181delACinsTA, p.Gln61Lys, Tier I |           |                 |                 |                            |
| CTNNB1, c.134C>A, p.Ser45Tyr, Tier I           |           |                 |                 |                            |
| GNA11, c.547C>T, p.Arg183Cys, Tier II          |           |                 |                 |                            |

|                                     |
|-------------------------------------|
| *BRAF,c.1411G>T, p.Val471Phe,Tier I |
|-------------------------------------|

\*Idylla negative cases.

Supplemental Table S5: Hairy cell leukemia specimens with Idylla-identifiable *BRAF* mutations and/or with additional genetic alterations

| GENE                                           | Frequency | Idylla positive | Cases with additional mutations |
|------------------------------------------------|-----------|-----------------|---------------------------------|
| BRAF (hairy cell leukemia [HCL])               | 11        | 10 (91%)        | 3 (27%)                         |
|                                                |           |                 |                                 |
| RUNX1, c.155T>A, p.Met52Lys Tier III           |           |                 |                                 |
| TET2, c.4522delG, p.Ala1508LeufsTer63 , Tier I |           |                 |                                 |
| SF3B1, c.1998G>C, p.Lys666Asn, Tier I          |           |                 |                                 |

Supplemental Table S6: Colorectal cancer specimens with Idylla-identifiable *BRAF* mutations and/or with additional genetic alterations

| GENE                                     | Frequency | Idylla positive | Idylla Negative | Cases with extra mutations |
|------------------------------------------|-----------|-----------------|-----------------|----------------------------|
| BRAF (CRC)                               | 53        | 51 (96%)        | 2 (4%)          | 17 (32%)                   |
|                                          |           |                 |                 |                            |
| PIK3CA, c.3140A>G, p.His1047Arg, Tier I  |           |                 |                 |                            |
| AKT1, c.49G>A, p.Glu17Lys, Tier I        |           |                 |                 |                            |
| AKT1, c.49G>A, p.Glu17Lys, Tier I        |           |                 |                 |                            |
| ALK, c.3386A>G, p.Glu1129Gly, Tier III   |           |                 |                 |                            |
| KRAS, c.35G>A, p.Gly12Asp, Tier I        |           |                 |                 |                            |
| ERBB2, c.3034G>A, p.Asp1012Asn, Tier III |           |                 |                 |                            |
| PIK3CA, c.3140A>T, p.His1047Leu, Tier I  |           |                 |                 |                            |
| PIK3CA, c.3141T>A, p.His1047Gln, Tier II |           |                 |                 |                            |
| PIK3CA, c.1634A>G, p.Glu545Gly, Tier I   |           |                 |                 |                            |
| CTNNB1, c.136C>A, p.Leu46Met, Tier III   |           |                 |                 |                            |
| PIK3CA, c.1624G>A, p.Glu542Lys, Tier I   |           |                 |                 |                            |
| PIK3CA, c.278G>A, p.Arg93Gln, Tier II    |           |                 |                 |                            |
| PIK3CA, c.277C>T, p.Arg93Trp, Tier II    |           |                 |                 |                            |
| PDGFRA, c.2471T>C, p.Val824Ala, Tier III |           |                 |                 |                            |
| MAP2K1, c.659C>T, p.Ala220Val, Tier III  |           |                 |                 |                            |
| PIK3CA, c.1637A>C, p.Gln546Pro, Tier II  |           |                 |                 |                            |



|                                              |
|----------------------------------------------|
| FGFR2, c.1196G>A, p.Arg399Gln, Tier III      |
| PIK3CA, c.1132T>C, p.Cys378Arg, Tier II      |
| PIK3CA, c.3139C>T, p.His1047Tyr, Tier II     |
| *KRAS, c.17T>A, p.Leu6His, Tier II           |
| KIT, c.1588G>A, p.Val530Ile, Tier III        |
| AKT1, c.138C>A, p.Asp46Glu, Tier III         |
| FGFR3, c.749C>T, p.Pro250Leu, Tier III       |
| RET, c.1883C>G, p.Pro628Arg, Tier III        |
| AKT1, c.106A>G, p.Ile36Val, Tier III         |
| GNA11, c.535G>A, p.Val179Met, Tier III       |
| *KRAS, c.33_34delTGinsAT, p.Gly12Cys, Tier I |
| BRAF, c.1799T>A, p.Val600Glu, Tier I         |
| ERBB3, c.2329G>T, p.Val777Leu, Tier I        |
| PIK3CA, c.1624G>A, p.Glu542Lys, Tier I       |
| PIK3CA, c.3140A>G, p.His1047Arg, Tier I      |
| BRAF, c.1799T>A, p.Val600Glu, Tier I         |
| ERBB3, c.3034G>A, p.Asp1012Asn, Tier III     |

**\*Idylla negative cases.**

**Supplemental Table S8:** Colorectal cancer specimens with Idylla-identifiable *NRAS* mutations and/or with additional genetic alterations

| GENE                                                                              | Frequency | Idylla positive | Cases with additional mutations |
|-----------------------------------------------------------------------------------|-----------|-----------------|---------------------------------|
| <i>NRAS</i> (CRC)                                                                 | 3         | 2 (66%)         | 2 (66%)                         |
|                                                                                   |           |                 |                                 |
| BRAF, c.1781A>G, p.Asp594Gly, Tier I                                              |           |                 |                                 |
| PIK3CA, c.1637A>G, p.Gln546Arg, Tier I<br>PIK3CA, c.3139C>T, p.His1047Tyr, Tier I |           |                 |                                 |

**Supplemental Table S9:** Lung adenocarcinoma specimens with Idylla-identifiable *EGFR* mutations and/or with additional genetic alterations

| Gene | Frequency | Idylla positive | Idylla Negative | Cases with additional mutations |
|------|-----------|-----------------|-----------------|---------------------------------|
|      |           |                 |                 |                                 |

|                                         |    |          |        |         |
|-----------------------------------------|----|----------|--------|---------|
| EGFR (Lung adenocarcinoma)              | 65 | 56 (86%) | 9 (7%) | 21(32%) |
|                                         |    |          |        |         |
| CTNNB1, c.110C>T, p.Ser37Phe, Tier I    |    |          |        |         |
| PIK3CA, c.1624G>A, p.Glu542Lys, Tier I  |    |          |        |         |
| BRAF, c.1799T>A, p.Val600Glu, Tier I    |    |          |        |         |
| PIK3CA, c.3140A>T, p.His1047Leu, Tier I |    |          |        |         |
| CTNNB1, c.95A>G, p.Asp32Gly, Tier I     |    |          |        |         |
| CTNNB1, c.98C>G, p.Ser33Cys, Tier I     |    |          |        |         |
| BRAF, c.1803A>C, p.Lys601Asn, Tier I    |    |          |        |         |
| EGFR, c.2320G>A, p.Val774Met, Tier II   |    |          |        |         |
| EGFR, c.2326C>T, p.Arg776Cys, Tier II   |    |          |        |         |
| JAK3, c.1957G>A, p.Val653Met, Tier III  |    |          |        |         |
| EGFR, c.2305G>A, p.Val769Met, Tier III  |    |          |        |         |
| EGFR, c.847G>T, p.Gly283Cys, Tier III   |    |          |        |         |
| KRAS, c.34G>T, p.Gly12Cys, Tier I       |    |          |        |         |
| KRAS, c.34G>T, p.Gly12Cys, Tier I       |    |          |        |         |
| *EGFR, c.2386G>A, p.Gly796Ser, Tier II  |    |          |        |         |
| PIK3CA, c.1625G>A, p.Glu542Val, Tier I  |    |          |        |         |
|                                         |    |          |        |         |
| KRAS, c.35G>T, p.Gly12Val, Tier I       |    |          |        |         |
| *EGFR, c.1723-1G>C, p.?, Tier III       |    |          |        |         |
| FGFR3, c.247C>T, p.Pro83Ser, Tier III   |    |          |        |         |
| EGFR, c.2494C>T, p.Arg832Cys, Tier III  |    |          |        |         |

**\*Idylla negative cases.**

**Supplemental Table S10:** Lung adenocarcinoma specimens with Idylla-identifiable *KRAS* mutations and/or with additional genetic alterations

| GENE                                         | Frequency | Idylla positive | Idylla Negative | Cases with additional mutations |
|----------------------------------------------|-----------|-----------------|-----------------|---------------------------------|
| KRAS (Lung adenocarcinoma)                   | 158       | 147(93%)        | 11 (7%)         | 25 (16%)                        |
|                                              |           |                 |                 |                                 |
| EGFR, c.2156G>C, p.Gly719Ala, Tier I         |           |                 |                 |                                 |
| BRAF, c.1786G>C, p.Gly596Arg, Tier I         |           |                 |                 |                                 |
| BRAF, c.1397G>T, p.Gly466Val, Tier I         |           |                 |                 |                                 |
| PIK3CA, c.3140A>T, p.His1047Leu, Tier I (x4) |           |                 |                 |                                 |
| PIK3CA, c.1633G>A, p.Glu545Lys, Tier I (x2)  |           |                 |                 |                                 |
| CTNNB1, c.110C>T, p.Ser37Phe, Tier I         |           |                 |                 |                                 |
| PIK3CA, c.3140A>T, p.His1047Leu, Tier I      |           |                 |                 |                                 |
| CTNNB1, c.121A>G, p.Thr41Ala, Tier I         |           |                 |                 |                                 |

|                                          |
|------------------------------------------|
| PIK3CA, c.3140A>T, p.His1047Leu, Tier I  |
| GNA11, c.547C>T, p.Arg183Cys, Tier I     |
| PIK3CA, c.241G>A, p.Glu81Lys, Tier II    |
| EGFR, c.2386G>A, p.Gly796Ser, Tier II    |
| EGFR, c.1723-1G>C, p.?, Tier III         |
| KIT, c.1960G>T, p.Val654Leu, Tier II     |
| MET, c.3779G>A, p.Gly1260Asp, Tier III   |
| PIK3CA, c.1064A>G, p.Tyr355Cys, Tier III |
| MAP2K1, c.171G>T, p.Lys57Asn, Tier II    |
| JAK3, c.1631T>C, p.Val544Ala, Tier III   |
| BRAF, c.658G>T, p.Glu220Ter, Tier III    |
| ALK, c.3398G>T, p.Gly1133Val, Tier III   |
| IDH1, c.314G>T, p.Gly105Val, Tier III    |
| ALK, c.3572C>A, p.Pro1191His, Tier III   |
| ALK, c.3362G>A, p.Gly1121Asp, Tier III   |
| ERBB2, c.2329G>T, p.Val777Leu, Tier I    |
| *KRAS, c.37G>T, p.Gly13Cys, Tier I       |
| MAP2K1, c.171G>T, p.Lys57Asn, Tier II    |
| *KRAS, c.101C>T, p.Pro34Leu, Tier I      |

**\*Idylla negative cases**
